# Supplementary material for: A short-chain dehydrogenase/reductase from Vibrio vulnificus with both blue fluorescence and oxidoreductase activity
Source: Royal Society of Chemistry journal article supplement (doi:10.1039/b616763b), 2007-01-01
Supplement: b616763b.pdf [file b616763b.pdf]

A short-chain dehydrogenase/reductase from *Vibrio vulnificus* with both blue fluorescence and oxidoreductase activity

Polizzi, Moore, Bommarius

## Supplementary Information.

1. The codon optimized BFP gene sequence was produced from DNAworks<sup>1</sup> using the amino acid sequence from NCBI (accession number: AAG41118). The program designed the 34 oligonucleotides to be used in gene synthesis. The DNAworks output is given below:

PROTEIN SEQUENCE, WITH 239 RESIDUES

```
-----  
1  MKKLVVITGASSGIGEAIRRFSSEEGHPLLLLARRVERLEALNLPNTLCAQVDVTDKNTF  
61  DAAITRAEKIYGPADVLVNNAGVMLLGQIDTQEANEWQRMFDVNVLGLLNMQAVLAPMK  
121 ARNSGTIINISSIAGKKTFFPDHAAYCGTKFAVHAISENVREEVAASNVRVTTIAPGAVET  
181 ELLSHTTSQQIKDGYDAWKVDMGGVLAADDVARAVLFAYQQPQNVCIREIALAPTKQQP  
-----
```

The DNA sequence # 1 is:

```
-----  
1  ATGAAGAAACTGGTTGTCATCACCGGCGCAAGCTCTGGCATTGGCGAAGCCATCGCGCGT  
61  CGCTTTAGCGAGGAAGGCCATCCATTACTGCTGCTGGCACGCCGTGTTGAGCGCTTAGAA  
121 GCCCTGAATCTGCCAAACACCCTGTGCGCCCAAGTCGACGTCACCGACAAGAACACGTTT  
181 GACGCAGCCATCACCCGCGCAGAGAAGATTTACGGCCCGGCAGACGCTGCTGGTGAATAAC  
241 GCGGGCGTCATGCTGTTAGGCCAAATCGACACCCAGGAAGCGAACGAGTGGCAGCGCATG  
301 TTTGACGTGAACGTGCTGGGTCTGTTAAACGGTATGCAGGCGGTCTTAGCACCGATGAAG  
361 GCGCGCAACAGCGGCACCATCATTAACATCAGCAGCATCGCAGGCAAGAAGACGTTCCCG  
421 GATCACGCGCGTACTGTGGCACCAATTCGCGGTGCACGCGATTTCTGAAAATGTCCGC  
481 GAAGAGGTCGCGGCTCTAATGTTTCGCGTGACGACGATTGCACCAGGCGCAGTCGAAACC  
541 GAGCTGCTGAGCCACACGACCAGCCAACAAATCAAGGACGGCTACGACGCATGGAAGGTC  
601 GACATGGGTGGTGTGCTGGCCGACAGACGATGTGCGCCGTCGCGTTCTGTTTGCGTACCAA  
661 CAGCCGCAAAACGTGTGCATCCGTGAGATCGCGCTGGCGCCGACCAAGCAGCAACCATGA  
721  
-----
```

34 oligonucleotides need to be synthesized

```
-----  
1  ATGAAGAAACTGGTTGTCATCACCGGCGCAAG 32  
2  ATGGCTTCGCCAATGCCAGAGCTTGCGCCGGTGATGACAA 40  
3  TGGCATTGGCGAAGCCATCGCGCGTCTGCTTTAGCGAGGAA 40  
4  CAGCAGCAGTAATGGATGGCCTTCCTCGCTAAAGCGACGC 40  
5  GGCCATCCATTACTGCTGCTGGCACGCCGTGTTGAGCGCT 40  
6  TGTTTGGCAGATTCAGGGCTTCTAAGCGCTCAACACGGCG 40  
7  TAGAAGCCCTGAATCTGCCAAACACCCTGTGCGCCCAAGT 40  
8  AACGTGTTCTTGTGCGGTGACGTCGACTTGGGCGCACAGGG 40  
9  CGTCACCGACAAGAACACGTTTCGACGCAGCCATCACCCGC 40  
10 TGCCGGGCCGTAAATCTTCTCTGCGCGGGTGATGGCTGCG 40  
11 GAAGATTTACGGCCCGGCAGACGCTGCTGGTGAATAACGCG 40  
12 GGCCTAACAGCATGACGCCCGGTTATTACCAGCACGTC 40  
13 GCGCTCATGCTGTTAGGCCAAATCGACACCCAGGAAGCGA 40  
14 AACATGCGCTGCCACTCGTTGCTTCTGGGTGTCGATTT 40  
15 CGAGTGGCAGCGCATGTTTGACGTGAACGTGCTGGGTCTG 40  
-----
```

Supplementary Material (ESI) for Chemical Communications  
This journal is (c) The Royal Society of Chemistry 2007

```
16 GACCGCTGCATACCGTTTAAACAGACCCAGCACGTTACAG 40
17 TTAAACGGTATGCAGGCGGTCTTAGCACCGATGAAGGCGC 40
18 GTTAATGATGGTGCAGCGCTGTTGCGCGCCTTCATCGGTGCT 40
19 CAACAGCGGCACCATCATTAACATCAGCAGCATCGCAGGC 40
20 GCGTGATCCGGGAACGTCTTCTTGCCCTGCGATGCTGCTGA 40
21 GACGTTCCCGGATCACGCGGCGTACTGTGGCACCAAATTC 40
22 AGAAATCGCGTGACCCGCGAATTTGGTGCCACAGTACGCC 40
23 GCGGTGCACGCGATTTCTGAAAATGTCCGCGAAGAGGTCG 40
24 ACGCGAACATTAGAGGCCGCGACCTCTTCGCGGACATTTT 40
25 CGGCCTCTAATGTTTCGCGTGACGACGATTGCACCAGGCGC 40
26 GGCTCAGCAGCTCGGTTTCGACTGCGCCTGGTGCAATCGT 40
27 GAAACCGAGTGTCTGAGCCACACGACCAGCCAACAAATCA 40
28 CATGCGTCGTAGCCGTCTTTGATTTGTTGGCTGGTTCGTGT 40
29 GGACGGCTACGACGCATGGAAGGTCGACATGGGTGGTGTG 40
30 GGCGACATCGTCTGCGGCCAGCACACCACCCATGTTCGACC 40
31 CCGCAGACGATGTGCCCCGTGCCGTTCTGTTTGCGTACCA 40
32 TGCACACGTTTTCGCGGCTGTTGGTACGCAAACAGAACGGC 40
33 AGCCGCAAAACGTGTGCATCCGTGAGATCGCGCTGGCGCC 40
34 TCATGGTTGCTGCTTGGTTCGGCGCCAGCGCGA 32
```

2. The gene was synthesized according to the procedure in Stemmer<sup>2</sup>. Briefly, the oligonucleotides mixed in equal molar ratio and diluted to 250 nM in a 50 µl PCR reaction. A hot start program with preincubation of all components except for the Pfu polymerase was employed with an annealing temperature of 55°C and an extension time of 30 seconds. Ten microliters of this PCR product was used in a second PCR reaction with the terminal primers to amplify the full length product.
3. The point mutations were incorporated via overlap extension PCR using the following oligonucleotides (5' to 3'):

```
bfp40ks cgccgtgtgagcgcttaaagccctgaatctgccaacacc
bfp40kas ggtgtttggcagattcagggctttaagcgtcaacacggcg
```

```
bfp7677s cgagagaagatttacggcccggcagacgcatgtaataacggggcg
bfp7677as cgcccgcgtattcacgatcgcgtctgccggccgtaaatctctctcg
```

```
bfpv83ms gtgaataacggggcatgatgctgtaggccaatcg
bfpv83mas cgatttggcctaacagcatcatgcccgcgtattcac
```

```
bfps124cs cgatgaaggcgcgcaactgcggcaccatcattaacatcagc
bfps124cas gctgatgtaatgatggtgccgcagttgcgccttcatcg
```

```
bfp176179s cgcgtgacgacgattgaccaagcgcagtcaaaaccgagctgctgagccacagc
bfp176179as cgttggtgctcagcagctcggtttgactgcgcttggtgcaatcgtcgtcacgcg
```

BFP-7 was synthesized from 6 fragments in one step and BFP-2 from 2 fragments in one step using the cycling program outlined above.

4. The BFP variants were overexpressed in *E. coli* BL21 cells using 0.1 mM IPTG at room temperature for 4 hours. The cells were harvested by centrifugation, lysed by sonication, centrifuged again to remove cell debris and the BFP protein was purified by immobilized metal affinity chromatography on Ni-NTA resin (Qiagen, Valencia, CA). The purity of the proteins was assessed by SDS-PAGE using a 12% tris-glycine gel.

SDS-PAGE gel (12%) of cell lysate of BFP wild-type, double and heptuple mutant

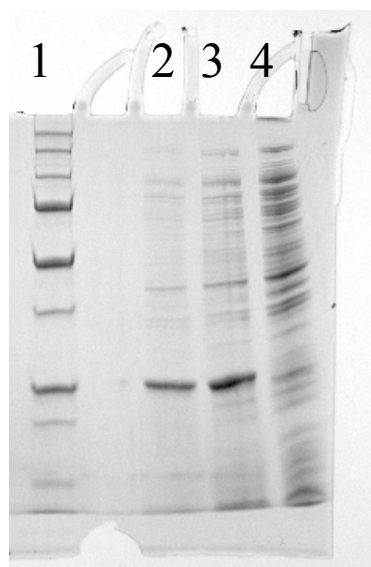

1. Ladder
2. 15 $\mu$ L of wild-type
3. 15 $\mu$ L of double mutant (BFP-2)
4. 15 $\mu$ L of 7-mutant (BFP-7)

All proteins diluted to about  
1000  $\mu$ g/mL

#### References

1. D. Hoover and J. Lubkowski, *Nucleic Acids Res*, 2002, **30**, e43.
2. W. Stemmer, A. Cramer, K. Ha, T. Brennan and H. Heyneker, *Gene*, 1995, **164**, 49-53.
